# Supplementary material for: Effect of Alfalfa-Derived Biochar on Anaerobic Digestion of Dairy Manure
Source: MDPI journal article supplement (doi:10.3390/agronomy12040911), 2022-04-11
Supplement: s1 [file s1]

Archive with 1 entries (1 files):
- agronomy-1633316-supplementary.pdf
