# Supplementary material for: Effect of Alfalfa-Derived Biochar on Anaerobic Digestion of Dairy Manure
Source: MDPI journal article supplement (doi:10.3390/agronomy12040911), 2022-04-11
Supplement: s1 [file s1 › agronomy-1633316-supplementary.pdf]

## Supplementary materials

**Table S1.** Summary of effects of various biochars on methane production during the anaerobic digestion.

| BC feedstock  | Pyrolysis temperature (°C) | AD substrate           | Effects of BC on methane production              | Reference |
|---------------|----------------------------|------------------------|--------------------------------------------------|-----------|
| Rice straw    | 500                        | Municipal solid waste  | Methane production increased by 11.69%           | [1]       |
| Coconut shell | 600                        | Straw and cow manure   | Methane yield increased by 12.97%                | [2]       |
| Sewage sludge | 300                        | Waste activated sludge | Methane yield increased by 4.17%                 | [3]       |
| Sawdust       | 500                        | Sludge and food waste  | Methane production rate increased by 22.4%-40.3% | [4]       |
| Coconut shell | 450                        | Citrus peel waste      | Methane yield increased by 12.60                 | [5]       |
| Pinewood      | -                          | Wastewater sludge      | Methane production increased by 14.42-47.80%     | [6]       |
| Dairy manure  | 350                        | Dairy manure           | Methane yield increased by 24.69-26.47%          | [7]       |

**Table S2.** The biotoxicity of leaching solution of AF-BC at various concentrations.

| AF-BC concentration | Inhibition (%) <sup>a</sup> |
|---------------------|-----------------------------|
| 1 g/L               | 4.48                        |
| 5 g/L               | 9.91                        |
| 10 g/L              | 17.22                       |

<sup>a</sup>Inhibition (%) was calculated according to the comparison of color development between the sample and negative control (DI water).

**Table S3.** The physicochemical characteristics of AF and AF-BC.

|       | Elemental analysis (wt. %)  |     |      |     | O/C | H/C  | Proximate analysis<br>(%, dry basis) |                 |     |
|-------|-----------------------------|-----|------|-----|-----|------|--------------------------------------|-----------------|-----|
|       | C                           | H   | O    | N   |     |      | Fixed Carbon                         | Volatile Carbon | Ash |
| AF    | 43.9                        | 5.8 | 38.5 | 2.4 | 0.7 | 1.6  | 5.5                                  | 85.1            | 9.4 |
| AF-BC | 68.8                        | 4.8 | 14.4 | 4.9 | 0.2 | 0.8  | 34.5                                 | 58.4            | 7.1 |
|       | Mineral composition (wt. %) |     |      |     |     |      | BET surface area                     |                 |     |
|       | N                           | P   | K    | Ca  | Mg  | Fe   | (m <sup>2</sup> /g)                  |                 |     |
| AF    | 2.4                         | 0.2 | 2.2  | 1.2 | 0.3 | <0.1 | 0.6                                  |                 |     |
| AF-BC | 4.9                         | 0.2 | 0.1  | 1.4 | 0.3 | 0.1  | 3.5                                  |                 |     |

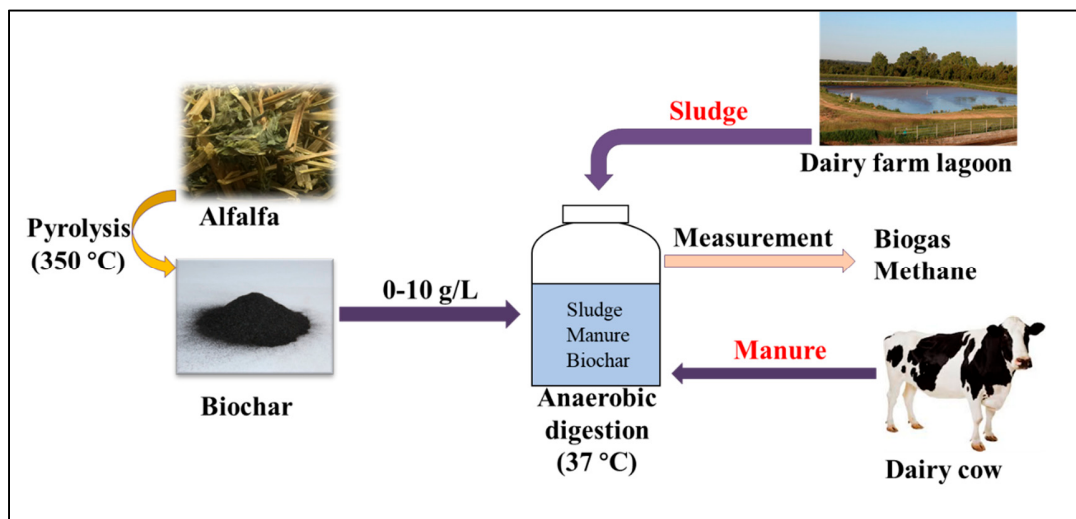

**Figure S1.** Experiment set-up for anaerobic digestion of dairy manure with addition of AF-BC.

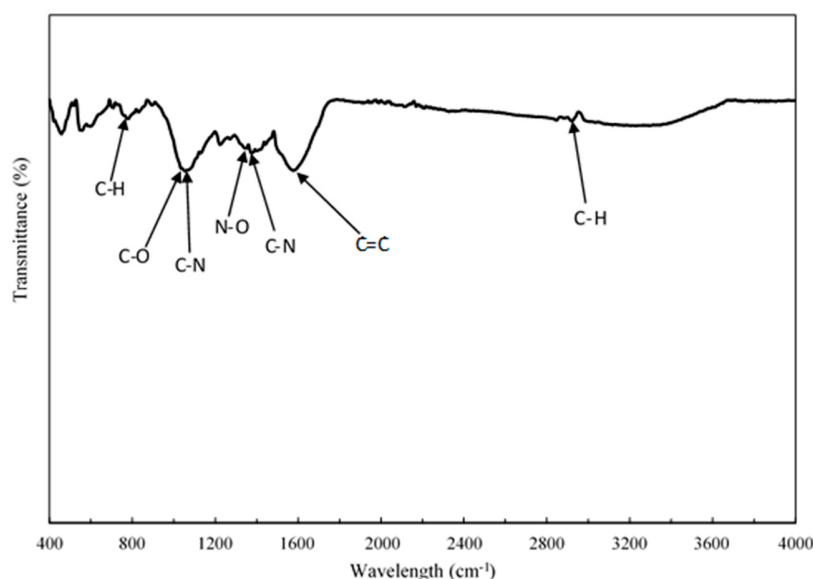

**Figure S2.** FT-IR spectrum of AF-BC.

## References

1. Qin, Y.; Wang, H.; Li, X.; Cheng, J.J.; Wu, W. Improving methane yield from organic fraction of municipal solid waste (OFMSW) with magnetic rice-straw biochar. *Bioresour. Technol.* **2017**, *245*, 1058-1066.
2. Shen, R.; Jing, Y.; Feng, J.; Luo, J.; Yu, J.; Zhao, L. Performance of enhanced anaerobic digestion with different pyrolysis biochars and microbial communities. *Bioresour. Technol.* **2020**, *296*, 122354.
3. Wu, B.; Yang, Q.; Yao, F.; Chen, S.; He, L.; Hou, K.; Pi, Z.; Yin, H.; Fu, J.; Wang, D.; Li, X. Evaluating the effect of biochar on mesophilic anaerobic digestion of waste activated sludge and microbial diversity. *Bioresour. Technol.* **2019**, *294*, 122235.
4. Wang, G.; Li, Q.; Gao, X.; Wang, X.C. Synergetic promotion of syntrophic methane production from anaerobic digestion of complex organic wastes by biochar: Performance and associated mechanisms. *Bioresour. Technol.* **2018**, *250*, 812-820.
5. Fagbohunbe, M.O.; Herbert, B.M.; Hurst, L.; Li, H.; Usmani, S.Q.; Semple, K.T. Impact of biochar on the anaerobic digestion of citrus peel waste. *Bioresour. Technol.* **2016**, *216*, 142-149.
6. Shen, Y.; Linville, J.L.; Ignacio-de Leon, P.A.A.; Schoene, R.P.; Urgan-Demirtas, M. Towards a sustainable paradigm of waste-to-energy process: Enhanced anaerobic digestion of sludge with woody biochar. *J. Cleaner Prod.* **2016**, *135*, 1054-1064.
7. Jang, H.M.; Choi, Y.K.; Kan, E. Effects of dairy manure-derived biochar on psychrophilic, mesophilic and thermophilic anaerobic digestions of dairy manure. *Bioresour. Technol.* **2018**, *250*, 927-931.
